# Supplementary material
Source: ML conference proceedings conference paper supplement (https://openreview.net/forum?id=b0B6JQF8Xj)
Supplement: supplementary_material [file plot-example-1.pdf › supp/plot-example-1.pdf]

Chart

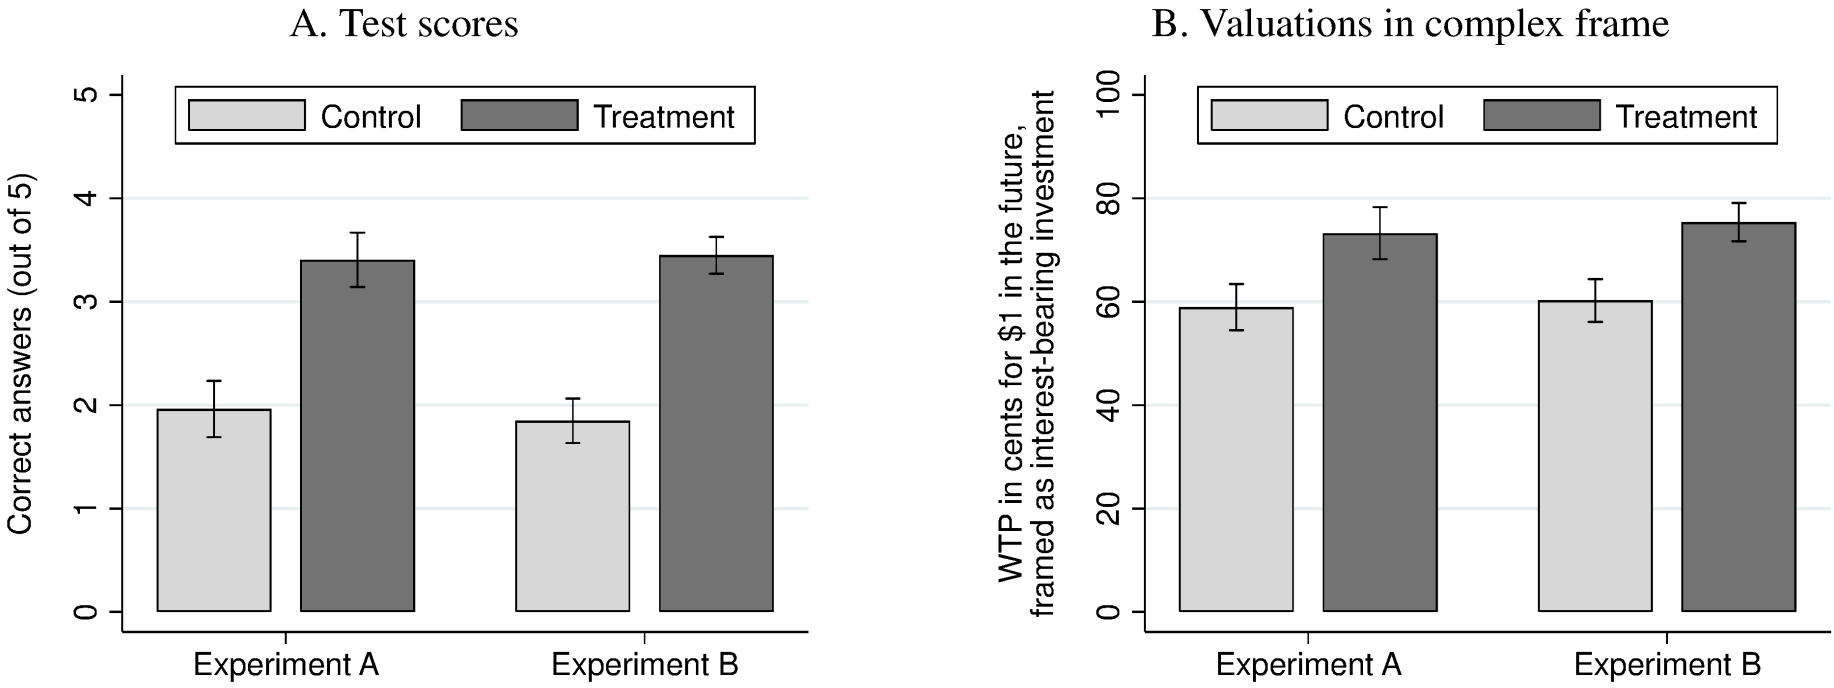

Ground-truth

```
```csv
"Subplot Value","Type-1","Type-2","Value","Error Bar Length"
"Test Scores","Experiment A","Control","1.948529411764706","0.5441176470588235"
"Test Scores","Experiment B","Control","1.8455882352941178","0.4264705882352941"
"Test Scores","Experiment A","Treatment","3.4044117647058822","0.5294117647058824"
"Test Scores","Experiment B","Treatment","3.4338235294117645","0.35294117647058826"
"Valuations in complex frame","Experiment A","Control","58.82352941176471","8.823529411764707"
"Valuations in complex frame","Experiment B","Control","60.0","8.088235294117647"
"Valuations in complex frame","Experiment A","Treatment","73.08823529411765","10.147058823529411"
"Valuations in complex frame","Experiment B","Treatment","75.0","7.5"
```
```

COT Reasoning

<thinking>

This image contains a histogram, so I will follow the steps for handling plots:

1. Identify the subplots and curves in the plot.
2. Clear the details of the subplots and curves including namings and data points.
3. Define the CSV structure with the necessary columns.

<\thinking>

<step>

1. Determine the subplots and curves:
  - The plot contains two subplots named "Test Scores" and "Valuations in complex frame."
  - Both subplots have two curves each, labeled "Control" and "Treatment."
  - All data points have error bars. Values are the y-axis values, and the independent variable is on the x-axis.

<\step>

<step>

2. Clear the details of the subplots and curves:
  - The first subplot "Test Scores" has two curves, "Control" and "Treatment." Each curve has two data points.
    - Both curves are histograms with error bars.
    - The potential indepdenent variable is "Experiment A" and "Experiment B."
  - The second subplot "Valuations in complex frame" also has two curves, "Control" and "Treatment." Each curve has two data points.
    - Both curves are histograms with error bars.
    - The potential independent variable is "Experiment A" and "Experiment B."
  - Overall, there are 8 data points in the plot.

<\step>

<step>

3. Define the CSV structure:
  - The subplot labels will be represented in the "Subplot Value" column.
  - The values in the x-axis will be in the "Type-1" column, and the curve labels will be in the "Type-2" column.
  - The y-axis values will be in the "Value" column, and the error bar lengths will be in the "Error Bar Length" column.
  - The CSV file will have 5 columns and 8 rows.

<\step>

Now I will proceed with generating the CSV file: <Ground-truth>
