# Supplementary material
Source: ML conference proceedings conference paper supplement (https://openreview.net/forum?id=b0B6JQF8Xj)
Supplement: supplementary_material [file plot-example-2.pdf › supp/plot-example-2.pdf]

Chart

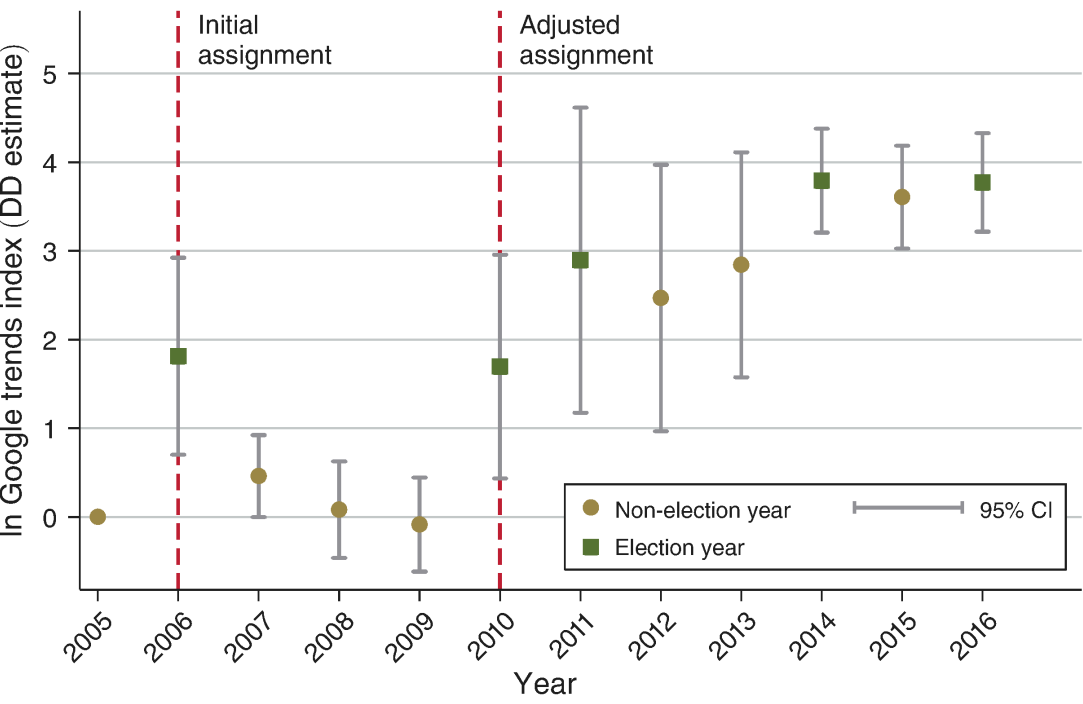

Ground-truth

```
```csv
Type-1,"Type-2","Value","Error Bar Length"
2005,"Non-election year","0.007824726134584736","0.17214397496087638"
2006,"Election year","1.8231611893583723","2.214397496087637"
2007,"Non-election year","0.47730829420970267","0.94679186228482"
2008,"Non-election year","0.09389671361502305","1.07981220657277"
2009,"Non-election year","-0.07042253521126796","1.0485133020344288"
2010,"Election year","1.6979655712050077","2.519561815336463"
2011,"Election year","2.9029733959311423","3.419405320813772"
2012,"Non-election year","2.4726134585289516","3.004694835680751"
2013,"Non-election year","2.84037558685446","2.519561815336463"
2014,"Election year","3.7949921752738653","1.158059467918623"
2015,"Non-election year","3.6071987480438183","1.158059467918623"
2016,"Election year","3.763693270735524","1.0954616588419406"
```
```

COT Reasoning

<thinking>

This image represents a dot plot with data points spanning different years, categorized into election years and non-election years. I will follow these steps to process the data:

1. Identify the variables and their roles in the data.
2. Extract details of the data points, including error bars.
3. Define the CSV structure with the necessary columns.

<\thinking>

<step>

1. Determine the variables:
  - This plot only has one subplot with two curves, representing "Election year" and "Non-election year."
  - The independent variable is the year, represented in the "Type-1" column.
  - A categorical variable "Election year" or "Non-election year" is represented in the "Type-2" column.
  - The dependent variable is the "Value" for each year, with error bars represented in the "Error Bar Length" column.

<\step>

<step>

2. Extract details of the data points:
  - The data spans multiple years (2005 to 2016), with each year categorized as an election year or non-election year.
  - Each data point includes a value and an error bar, which are extracted from the plot and mapped to the respective columns.

<\step>

<step>

3. Define the CSV structure:
  - The "Type-1" column will contain the years.
  - The "Type-2" column will contain the categorical labels for each year ("Election year" or "Non-election year").
  - The "Value" column will contain the dependent variable values for each year.
  - The "Error Bar Length" column will contain the error values for the data points.
  - The CSV file will have 4 columns and 12 rows.

<\step>

Now I will proceed with generating the CSV file: <Ground-truth>
