# Supplementary material
Source: ML conference proceedings conference paper supplement (https://openreview.net/forum?id=b0B6JQF8Xj)
Supplement: supplementary_material [file plot-example-3.pdf › supp/plot-example-3.pdf]

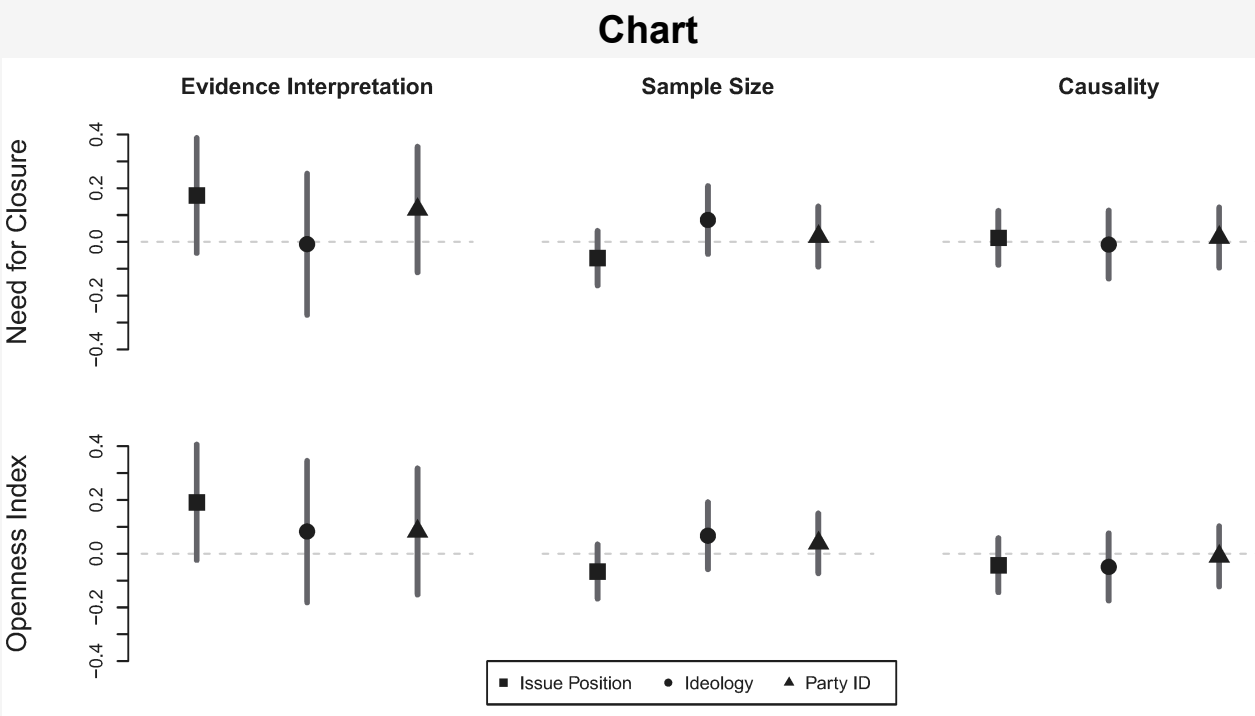

Ground-truth

```
```csv
"Type-1","Type-2","Subplot Value","Value","Error Bar Length"
"Evidence Interpretation","Issue Position","Need for Closure","0.1724604966139955","0.4514672686230249"
"Sample Size","Issue Position","Need for Closure","-0.05869074492099324","0.22573363431151244"
"Causality","Issue Position","Need for Closure","0.01534988713318286","0.2221218961625282"
"Evidence Interpretation","Ideology","Need for Closure","-0.006320541760722331","0.545372460496614"
"Sample Size","Ideology","Need for Closure","0.08397291196388262","0.2744920993227991"
"Causality","Ideology","Need for Closure","-0.008126410835214426","0.272686230248307"
"Evidence Interpretation","Party ID","Need for Closure","0.12009029345372463","0.48939051918735893"
"Sample Size","Party ID","Need for Closure","0.024379232505643333","0.24379232505643345"
"Causality","Party ID","Need for Closure","0.017155756207674955","0.2455981941309255"
"Evidence Interpretation","Issue Position","Openness Index","0.19547511312217197","0.4506787330316742"
"Sample Size","Issue Position","Openness Index","-0.06515837104072403","0.22262443438914029"
"Causality","Issue Position","Openness Index","-0.03800904977375569","0.22262443438914029"
"Evidence Interpretation","Ideology","Openness Index","0.1665158371040724","0.5520361990950227"
"Sample Size","Ideology","Openness Index","0.06696832579185519","0.2714932126696833"
"Causality","Ideology","Openness Index","-0.047058823529411764","0.2733031674208145"
"Evidence Interpretation","Party ID","Openness Index","0.08687782805429867","0.4904977375565611"
"Sample Size","Party ID","Openness Index","0.04162895927601806","0.24434389140271495"
"Causality","Party ID","Openness Index","-0.007239819004524861","0.24615384615384617"
```
```

COT Reasoning

<thinking>

This image contains a dot plot, so I will follow the steps for handling plots:

1. Identify the subplots and curves in the plot.
2. Define the CSV structure with the necessary columns.
3. Extract the details of the subplots and curves, including naming conventions and data points.

<\thinking>

<step>

1. Determine the subplots and curves:
  - The plot contains one subplot named "Need for Closure" and another named "Openness Index."
  - Each subplot has three curves labeled "Issue Position," "Ideology," and "Party ID."
  - The x-axis values are represented by "Evidence Interpretation," "Sample Size," and "Causality."
  - The y-axis values (dependent variable) are the plotted data points, and all data points have associated error bars.

<\step>

<step>

2. Extract the details of the subplots and curves:
  - The subplot "Need for Closure" includes three curves ("Issue Position," "Ideology," and "Party ID") with data points for x-axis values "Evidence Interpretation," "Sample Size," and "Causality." Each data point has an associated error bar length.
  - Similarly, the subplot "Openness Index" includes the same curves and x-axis values with corresponding data points and error bar lengths.
  - All data points are explicitly extracted without omission, and unique identifiers are provided for each curve and subplot.

<\step>

<step>

3. Define the CSV structure:
  - The subplot labels will be represented in the "Subplot Value" column.
  - The x-axis values will be in the "Type-1" column.
  - The curve labels will be in the "Type-2" column.
  - The y-axis values will be in the "Value" column.
  - The error bar lengths will be included in the "Error Bar Length" column.
  - The CSV file will have five columns: "Type-1," "Type-2," "Subplot Value," "Value," and "Error Bar Length."

<\step>

Now I will proceed with generating the CSV file: <Ground-truth>
