# Supplementary material
Source: ML conference proceedings conference paper supplement (https://openreview.net/forum?id=b0B6JQF8Xj)
Supplement: supplementary_material [file table-example-1.pdf › supp/table-example-1.pdf]

Chart

|                                     | Black voter registration rate |         |         |
|-------------------------------------|-------------------------------|---------|---------|
|                                     | (1)                           | (2)     | (3)     |
| Black lynching rate                 | 0.062                         |         |         |
| × some college experience of Blacks | (0.152)                       |         |         |
| Black lynching rate                 |                               | 0.002   |         |
| × monthly earnings of Blacks        |                               | (0.005) |         |
| Black lynching rate                 |                               |         | 0.028   |
| × Black member rate in 2010         |                               |         | (0.011) |
| Black lynching rate                 | −6.394                        | −9.050  | −7.242  |
|                                     | (4.424)                       | (9.306) | (1.732) |
| Historical controls                 | Yes                           | Yes     | Yes     |
| State fixed effects                 | Yes                           | Yes     | Yes     |
| Number of counties                  | 267                           | 267     | 267     |
| $R^2$                               | 0.548                         | 0.548   | 0.560   |

Ground-truth

```
```csv
"Empty Column 0","(1)","(1) (1)","(2)","(2) (1)","(3)","(3) (1)"
"Black lynching rate × some college experience of
Blacks","0.062","0.152","","","",""
"Black lynching rate × monthly earnings of Blacks","","","0.002","0.005","",""
"Black lynching rate × Black member rate in 2010","","","","","0.028","0.011"
"Black lynching rate","-6.394","4.424","-9.050","9.306","-7.242","1.732"
"Historical controls","1","","1","","1",""
"State fixed effects","1","","1","","1",""
"Number of counties","267","","267","","267",""
"R^2","0.548","","0.548","","0.560",""
```
```

COT Reasoning

<thinking>

This image contains a table. Requirements for this task include:

- 1. Determine the CSV structure. Split the columns for the statistics in the same cell into separate columns.
- 2. Name the columns and rows with the minimum information required to identify them.
- 3. Replace control variable checkmarks with 1/0.
- 4. No significant markers.

<\\thinking>

<step>

- 1. Determine the CSV structure:
  - All 3 columns with data points contain two statistics.
  - Should split each column into 2 columns with total 6 columns for data points and one column for the row headers.
  - No need to split the panels as they share the same headers.
  - The output should be one CSV file with 7 columns and 9 rows including the column and row headers.

<\\step>

<step>

- 2. Name columns:
  - To make each column unisueq, we use the "(1)", "(2)", and "(3)" for the three columns for first statistics in each column.
  - Append "(1)" to the columns for the second statistics in each column.
  - "Empty Column 0" for the row headers.

<\\step>

<step>

- 3. Name rows:
  - No hierarchical information in the row headers. Use the minimum information to identify the rows.
  - The row headers should be named as "Black lynching rate × some college experience of Blacks", "Black lynching rate × monthly earnings of Blacks", "Black lynching rate × Black member rate in 2010", "Black lynching rate", "Historical controls", "State fixed effects", "Number of counties", "R^2"

<\\step>

<step>

- 4. Replacements and modificantions:
  - In the rows "Historical controls" and "State fixed effects" replace the checkmarks with 1.
  - The second statistics are wrapped in parentheses. Need to remove them.
  - No significant markers and comma decimal points to remove.

<\\step>

Now I will proceed with generating the CSV file: <Ground-truth>
