# Supplementary material
Source: ML conference proceedings conference paper supplement (https://openreview.net/forum?id=b0B6JQF8Xj)
Supplement: supplementary_material [file table-example-2.pdf › supp/table-example-2.pdf]

| Chart                                        |                             |                             |                             |                                 |
|----------------------------------------------|-----------------------------|-----------------------------|-----------------------------|---------------------------------|
| Dependent variable:                          | Index of friendship         | Index of explicit attitudes | Index of prosocial behavior | Global index of social behavior |
|                                              | (1)                         | (2)                         | (3)                         | (4)                             |
| <i>Panel A. Whites</i>                       |                             |                             |                             |                                 |
| Mixed room                                   | 0.477<br>(0.187)<br>[0.044] | 0.671<br>(0.261)<br>[0.044] | 0.438<br>(0.250)<br>[0.088] | 0.760<br>(0.294)                |
| Mean of dependent variable in same race room | −1.053                      | −1.642                      | −0.873                      | −1.604                          |
| $R^2$                                        | 0.505                       | 0.369                       | 0.374                       | 0.458                           |
| Observations                                 | 94                          | 106                         | 94                          | 79                              |
| <i>Panel B. Blacks</i>                       |                             |                             |                             |                                 |
| Mixed room                                   | 0.254<br>(0.170)<br>[0.368] | 0.072<br>(0.166)<br>[0.666] | 0.229<br>(0.165)<br>[0.368] | 0.196<br>(0.212)                |
| Mean of dependent variable in same race room | −1.173                      | −0.562                      | −0.651                      | −1.465                          |
| $R^2$                                        | 0.155                       | 0.068                       | 0.099                       | 0.149                           |
| Observations                                 | 275                         | 299                         | 253                         | 203                             |
| <i>Panel C. Full sample</i>                  |                             |                             |                             |                                 |
| Mixed room                                   | 0.340<br>(0.128)<br>[0.029] | 0.318<br>(0.126)<br>[0.029] | 0.169<br>(0.138)<br>[0.230] | 0.439<br>(0.150)                |
| Mean of dependent variable in same race room | −1.110                      | −0.810                      | −0.705                      | −1.457                          |
| $R^2$                                        | 0.317                       | 0.186                       | 0.168                       | 0.321                           |
|                                              | 411                         | 453                         | 388                         | 315                             |
| Controls                                     | X                           | X                           | X                           | X                               |
| Roommate controls                            | X                           | X                           | X                           | X                               |

Ground-truth

```
```csv
"Empty Column 0","Index of friendship","Index of friendship (1)","Index of friendship (2)","Index of explicit attitudes","Index of explicit attitudes
(1)","Index of explicit attitudes (2)","Index of prosocial behavior","Index of prosocial behavior (1)","Index of prosocial behavior (2)","Global
index of social behavior","Global index of social behavior (1)"
"Whites - Mixed room","0.477","0.187","0.044","0.671","0.261","0.044","0.438","0.250","0.088","0.760","0.294"
"Whites - Mean of dependent variable in same race room",-1.053,"","",-1.642,"","",-0.873,"","",-1.604,""
"Whites - R^2","0.505","","","0.369","","","0.374","","","0.458",""
"Whites - Observations","94","","","106","","","94","","","79",""
"Blacks - Mixed room","0.254","0.170","0.368","0.072","0.166","0.666","0.229","0.165","0.368","0.196","0.212"
"Blacks - Mean of dependent variable in same race room",-1.173,"","",-0.562,"","",-0.651,"","",-1.465,""
"Blacks - R^2","0.155","","","0.068","","","0.099","","","0.149",""
"Blacks - Observations","275","","","299","","","253","","","203",""
"Full sample - Mixed room","0.340","0.128","0.029","0.318","0.126","0.029","0.169","0.138","0.230","0.439","0.150"
"Full sample - Mean of dependent variable in same race room",-1.110,"","",-0.810,"","",-0.705,"","",-1.457,""
"Full sample - R^2","0.317","","","0.186","","","0.168","","","0.321",""
"Full sample - Observations","411","","","453","","","388","","","315",""
"Controls","1","","","1","","","1","","","1",""
"Roommate controls","1","","","1","","","1","","","1",""
````
```

COT Reasoning

```
<thinking>
This image contains a table, so I will follow the steps for handling tables:
1. Identify the CSV structure and split cells containing multiple statistics into separate columns.
2. Ensure the column and row headers provide only the minimum identifying information.
3. Replace any control variable checkmarks with 1/0.
4. Maintain significant markers and follow other table formatting rules.
<\thinking>

<step>
1. Determine the CSV structure:
- Each column for data points contains up to three statistics, except the last column, which only has two statistics.
So the each of the first three columns needs to be split into three columns: one for the primary statistic and two additional columns. The last
column should be split into two columns.
- No need to split the table into multiple CSV files.
- The table will have a total of 12 columns for data points including row headers.
<\step>

<step>
2. Name columns:
- To make each column unique, append "(1)" and "(2)" to the additional columns for the second and third statistics.
- Use "Empty Column 0" for the row header column.
- Column headers will include names like "Index of friendship," "Index of explicit attitudes," and "Index of prosocial behavior," with additional
columns appended with "(1)" and "(2)" for split statistics.
<\step>

<step>
3. Name rows:
- The row headers contain hierarchical information. Combine the information of panel names and row headers with a dash.
- Use minimal information to identify the rows, such as "Whites - Mixed room," "Blacks - Mixed room," and "Full sample - Mixed room."
<\step>

<step>
4. Replacements and modifications:
- Replace checkmarks for "Controls" and "Roommate controls" with 1.
- No significant markers are present, and there are no commas to remove from decimal points.
- Ensure that all parentheses around statistics are removed.
<\step>
```

Now I will proceed with generating the CSV file: <Ground-truth>
