# Supplementary material
Source: ML conference proceedings conference paper supplement (https://openreview.net/forum?id=b0B6JQF8Xj)
Supplement: supplementary_material [file table-example-3.pdf › supp/table-example-3.pdf]

| Chart                         |                      |                      |                          |                     |                           |                   |                    |                          |
|-------------------------------|----------------------|----------------------|--------------------------|---------------------|---------------------------|-------------------|--------------------|--------------------------|
|                               | Average score<br>(1) | Chinese score<br>(2) | Mathematics score<br>(3) | Extraversion<br>(4) | Agree-<br>ableness<br>(5) | Openness<br>(6)   | Neuroticism<br>(7) | Conscientiousness<br>(8) |
| Panel A. Lower-track students |                      |                      |                          |                     |                           |                   |                    |                          |
| MSR                           | 0.177<br>[0.074]     | 0.055<br>[0.078]     | 0.238<br>[0.089]         | 3.042<br>[0.691]    | 3.618<br>[1.091]          | 1.317<br>[0.709]  | 1.014<br>[0.570]   | 2.148<br>[0.736]         |
| MSR × Different gender        | −0.092<br>[0.075]    | −0.148<br>[0.093]    | 0.005<br>[0.091]         | −1.446<br>[0.836]   | −1.746<br>[1.112]         | −0.464<br>[0.676] | −1.007<br>[0.737]  | −1.684<br>[0.835]        |
| Different gender              | 0.052<br>[0.057]     | 0.081<br>[0.056]     | −0.016<br>[0.076]        | 0.243<br>[0.734]    | −0.218<br>[0.774]         | 0.512<br>[0.587]  | 0.400<br>[0.607]   | 0.275<br>[0.763]         |
| Controls                      | Yes                  | Yes                  | Yes                      | Yes                 | Yes                       | Yes               | Yes                | Yes                      |
| Observations                  | 901                  | 901                  | 901                      | 901                 | 901                       | 901               | 901                | 901                      |
| Panel B. Upper-track students |                      |                      |                          |                     |                           |                   |                    |                          |
| MSR                           | −0.022<br>[0.087]    | −0.011<br>[0.072]    | −0.007<br>[0.103]        | 1.668<br>[0.866]    | 1.725<br>[1.407]          | 0.951<br>[0.584]  | −0.617<br>[0.793]  | 0.327<br>[0.918]         |
| MSR × Different gender        | 0.145<br>[0.086]     | 0.040<br>[0.099]     | 0.240<br>[0.096]         | 0.839<br>[0.820]    | 1.365<br>[1.256]          | −0.753<br>[0.583] | 1.295<br>[0.798]   | 1.221<br>[0.854]         |
| Different gender              | −0.113<br>[0.049]    | −0.047<br>[0.079]    | −0.177<br>[0.045]        | −0.268<br>[0.517]   | −0.704<br>[0.762]         | 0.650<br>[0.430]  | −0.016<br>[0.631]  | −0.149<br>[0.671]        |
| Controls                      | Yes                  | Yes                  | Yes                      | Yes                 | Yes                       | Yes               | Yes                | Yes                      |
| Observations                  | 901                  | 901                  | 901                      | 901                 | 901                       | 901               | 901                | 901                      |

Ground-truth

```
```csv
"Empty Column 0","Average score","Average score (1)","Chinese score","Chinese score (1)","Mathematics score","Mathematics score (1)","Extraversion","Extraversion (1)","Agreeableness","Agreeableness (1)","Openness","Openness (1)","Neuroticism","Neuroticism (1)","Conscientiousness","Conscientiousness (1)"
"Lower-track students - MSR","0.177","0.074","0.055","0.078","0.238","0.089","3.042","0.691","3.618","1.091","1.317","0.709","1.014","0.570","2.148","0.736"
"Lower-track students - MSR × Different gender","-0.092","0.075","-0.148","0.093","0.005","0.091","-1.446","0.836","-1.746","1.112","-0.464","0.676","-1.007","0.737","-1.684","0.835"
"Lower-track students - Different gender","0.052","0.057","0.081","0.056","-0.016","0.076","-0.243","0.734","-0.218","0.774","0.512","0.587","0.400","0.607","0.275","0.763"
"Lower-track students - Controls","1","","1","","1","","1","","1","","1","","1","","1","","1"
"Lower-track students - Observations","901","","901","","901","","901","","901","","901","","901","","901","","901"
"Upper-track students - MSR","-0.022","0.087","-0.011","0.072","-0.007","0.103","1.668","0.866","1.725","1.407","0.951","0.584","-0.617","0.793","0.327","0.918"
"Upper-track students - MSR × Different gender","0.145","0.086","0.040","0.099","0.240","0.096","0.839","0.820","1.365","1.256","-0.753","0.583","1.295","0.798","1.221","0.854"
"Upper-track students - Different gender","-0.113","0.049","-0.047","0.079","-0.177","0.045","-0.268","0.517","-0.704","0.762","0.650","0.430","-0.016","0.631","-0.149","0.671"
"Upper-track students - Controls","1","","1","","1","","1","","1","","1","","1","","1","","1"
"Upper-track students - Observations","901","","901","","901","","901","","901","","901","","901","","901","","901"
```
```

COT Reasoning

```
<thinking>
The table includes various scores, so the task steps will be as follows:
1. Define the CSV structure by identifying columns and splitting cells with multiple statistics.
2. Ensure columns and rows have concise, identifying names.
3. Replace any control variable checkmarks with 1/0.
4. Follow table formatting rules.
<\thinking>

<step>
1. Determine the CSV structure:
- Each data column has two statistics, so each needs two columns.
- The table will therefore have 8 primary columns, each split into two sub-columns, resulting in 16 columns for data points, plus 1 column for the row headers.
- This makes a total of 17 columns.
- No need to split the table into multiple CSV files. The final output will be one CSV file with 17 columns and 9 rows.
<\step>

<step>
2. Name columns:
- To keep columns unique, append "(1)" to the additional column for the second statistic in each category.
- The column headers will follow the names in the table, such as "Average score," "Chinese score," and "Mathematics score."
- The row header column will be labeled as "Empty Column 0."
<\step>

<step>
3. Name rows:
- The row headers distinguish between "Lower-track" and "Upper-track" students with subcategories like "MSR" and "Different gender."
- Each row should concate the panel names with the row headers using a dash, e.g. "Lower-track students - MSR."
<\step>

<step>
4. Replacements and modifications:
- Replace checkmarks in the "Controls" rows with 1.
- No significant markers or commas in decimal points are present, so no further modifications are needed.
<\step>
```

Now I will proceed with generating the CSV file: <Ground-truth>
